# Freshwater Sponges Have Functional, Sealing Epithelia with High Transepithelial Resistance and Negative Transepithelial Potential

Emily D. M. Adams, Greg G. Goss, Sally P. Leys\*

Physiology, Cell and Developmental Biology Group, Department of Biological Sciences, University of Alberta, Edmonton, Alberta, Canada

## Abstract

Epithelial tissue — the sealed and polarized layer of cells that regulates transport of ions and solutes between the environment and the internal milieu — is a defining characteristic of the Eumetazoa. Sponges, the most ancient metazoan phylum [1,2], are generally believed to lack true epithelia [3,4,5], but their ability to occlude passage of ions has never been tested. Here we show that freshwater sponges (Demospongiae, Haplosclerida) have functional epithelia with high transepithelial electrical resistance (TER), a transepithelial potential (TEP), and low permeability to small-molecule diffusion. Curiously, the *Amphimedon queenslandica* sponge genome lacks the classical occluding genes [5] considered necessary to regulate sealing and control of ion transport. The fact that freshwater sponge epithelia can seal suggests that either occluding molecules have been lost in some sponge lineages, or demosponges use novel molecular complexes for epithelial occlusion; if the latter, it raises the possibility that mechanisms for occlusion used by sponges may exist in other metazoa. Importantly, our results imply that functional epithelia evolved either several times, or once, in the ancestor of the Metazoa.

**Citation:** Adams EDM, Goss GG, Leys SP (2010) Freshwater Sponges Have Functional, Sealing Epithelia with High Transepithelial Resistance and Negative Transepithelial Potential. PLoS ONE 5(11): e15040. doi:10.1371/journal.pone.0015040

**Editor:** Bradley Steven Launikonis, University of Queensland, Australia

**Received:** August 13, 2010; **Accepted:** October 13, 2010; **Published:** November 29, 2010

**Copyright:** © 2010 Adams et al. This is an open-access article distributed under the terms of the Creative Commons Attribution License, which permits unrestricted use, distribution, and reproduction in any medium, provided the original author and source are credited.

**Funding:** This study was funded by Discovery Grants from the National Science and Engineering Research Council of Canada (G.G. and S.P.L.). The funders had no role in study design, data collection and analysis, decision to publish, or preparation of the manuscript.

**Competing Interests:** The authors have declared that no competing interests exist.

\* E-mail: sleys@ualberta.ca

## Introduction

A sealed epithelium is necessary to control the internal milieu of animals but it is particularly important in fresh water, where osmotic stress and loss of ions can disrupt cell physiology [6]. Epithelia are considered to have first evolved in ancestors of the Cnidaria, so sponges (Porifera), which diverged up to 200 million years prior to other metazoans [2], are the only multicellular animals thought to lack true epithelia, and it is widely considered that the environment can circulate through the sponge body [3,4,5,7]. The most current phylogenomic analyses of animal relationships place sponges as most basal [1,5,8], but other hypotheses suggest ctenophores or placozoans are the earliest branching group [9,10], both of which are considered to have true occluding epithelia [11,12,13,14]. In these scenarios sponges must have lost the ability to form epithelia with occluding junctions.

Epithelia are composed of simple or stratified layers of polarized cells that are connected by intercellular junctions. In most animals desmosomes and adherens junctions (AJs) control whole tissue integrity [4], while semi-permeable occluding junctions such as tight junctions (TJs) or septate junctions (SJs) selectively control molecule and ion passage between cells [15]. Epithelia are also usually supported by an extracellular basement membrane (the basal lamina), which prevents dedifferentiation and migration of cells into the mesenchyme [16]. Although epithelial characteristics are often rigidly defined, epithelia are actually dynamic structures with variable integrity and tightness depending on physiological

requirements throughout the body or during ontogeny [17]. Moreover the recent discovery of new types of cell junctions in vertebrate tissues [18] demonstrates that the characterization of cell-cell interactions is still a developing field: in some instances molecules are absent where the morphology shows a junction; in others, junctional molecules are present but no junction can be seen by electron microscopy [18]. Sealing and adhesion may therefore occur in the absence of classical occluding and adherens molecules or junctions.

In the early 20th century sponges were considered to be syncytial because the limits of cell boundaries were often very hard to discern by light microscopy [19,20]. Later transmission and scanning electron microscopy confirmed that all sponges except Hexactinellida are cellular; glass sponges are unusual because their tissues fuse during early embryogenesis to form syncytia [21] which allow the propagation of electrical impulses through the whole animal [22]. All other sponges are cellular, and as far as it is known there are no aqueous junctions (e.g. gap junctions) between cells; therefore cellular sponges do not propagate electrical signals.

The surface of cellular sponges is formed by a single layer of thin, pentagonal cells called pinacocytes (pavement cells) that enclose a collagenous mesohyl (middle layer) containing mobile amoeboid cells. Sponge pinacoderms are polarized by the unilateral secretion of proteins and express the polarity genes *Frizzled*, *discs large*, *Par*, and *Crumbs* [5,23,24]. The membranes of adjacent pinacocytes are typically closely apposed, separated by a small 15 nm intercellular gap [11]. Desmosomes and junctions

with septae have been found between cells in all sponges [17], and although cadherins and catenins are present in the sponge genome [5], only a few of the genes associated with conventional SJs appear to be present (e.g., *discs large* [5] and *neurexin* [25]). The most convincing images of junctions with dense septae are between cells that secrete spicules in the Calcarea [26], and this has given rise to the opinion that septate junctions only arise transiently to isolate regions for spiculogenesis [27,28]. But regions of membrane fusion [29,30] also occur in sponges, and some tight junction-related genes (e.g., members of the tetraspanin and MAGUK family of proteins) are in the *Amphimedon* genome [5,24] and are expressed in the pinacoderm of other demosponges [31].

Among Porifera, the homoscleromorphs (Homoscleromorpha) are distinct in possessing a clear basement membrane with immunoreactivity to type IV collagen [32]. Although other sponges appear to lack an obvious basement membrane, a structurally similar network containing fibronectin and a homolog of type IV collagen underlies pinacoderms [17,33,34], and integrins are localized at the basal cell surface [5,35]. Thus sponges as a group possess the components for a functional extracellular matrix capable of supporting an epithelium, but only homoscleromorphs possess a typical basement membrane, the importance of which is unclear.

We recently demonstrated that freshwater sponge pinacocytes are static over time [17] and that glutaminergic signalling controls a coordinated inflation and contraction behaviour – in effect, a sponge ‘sneeze’ [36]. Other demosponges as well as calcisponges (Calcarea) and homoscleromorphs are also able to contract periodically [37]. These behavioural traits are evidence that pinacocytes must establish stable attachments for communication and coordination. But the ultimate demonstration of an epithelium is the ability to regulate selectively the passage of solutes: that is, its ability to seal and create a transepithelial potential [4]. Although all animals must have some ability to regulate ion balance in the internal matrix, freshwater animals, including freshwater demos-

sponges, must have experienced strong evolutionary pressures to regulate an internal environment, and therefore this group provides a particularly valuable model to study the emergence of key features of functional epithelia.

To determine whether freshwater sponge epithelia can seal and generate an electrochemical potential we took advantage of the ability of sponge cells to form aggregates from dissociated cells [38] and hatch from gemmules (cysts of undifferentiated cells), enabling us to grow cell cultures on permeable membranes. We show that *Spongilla lacustris* tissue has transepithelial resistance, is impermeable to the passage of small tracer molecules, and has a negative transepithelial voltage and therefore functions in all aspects as a true epithelium. This is the first demonstration of functional epithelia outside of the Eumetazoa sensu stricto.

## Results

*Spongilla lacustris* cells formed confluent layers 3–5 days after seeding culture membranes with either aggregates or gemmules. We measured the transepithelial electrical resistance on either side of the sponge tissue using chopstick electrodes inserted into the upper (apical) and lower (basolateral) chambers (Figure 1A). The electrode in the apical chamber was set at zero while the electrode in the basal chamber recorded the resistance/voltage. Scanning electron microscopy showed that the cultures had all the attributes of a typical sponge (Figure 1B) with closely apposed exopinacocytes in the dermal tissue or surface of the sponge (Figure 1C), canals lined by endopinacocytes, choanocyte chambers and an osculum or chimney-like vent; they were therefore good models of native sponge tissues. The sponge basopinacoderm (which contacts the culture membrane directly) is formed by exopinacocytes which secrete proteins that form an attachment to surfaces. Since the canal system is contiguous with the external environment, resistance to ion passage occurred through two simple cell layers, the endopinacoderm and basopinacoderm (Figure 1A inset). The

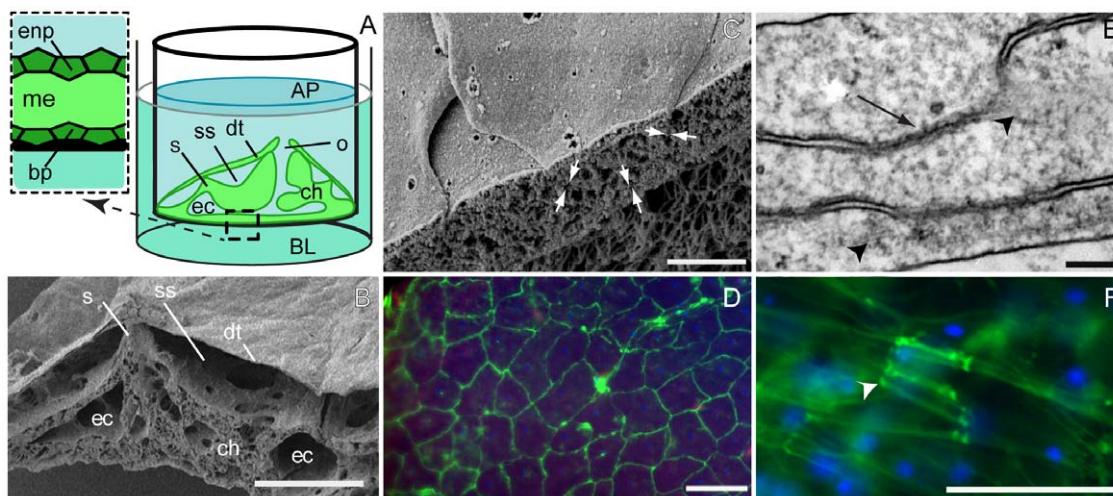

**Figure 1. Structure of the sponge epithelium.** (A) Diagram of the experimental chamber, and (B) scanning electron microscopy (SEM) of sponge tissue showing: the bilayered dermal tissues (dt), suspended over the subdermal space (ss) by shafts of spicules (s); the choanosome (ch) with the choanocyte pumps; excurent canals (ec); and an osculum (o). For transepithelial recordings, apical (AP) and basolateral (BL) compartments were effectively separated by two confluent cell layers – the basopinacoderm (bp) and endopinacoderm (enp) – surrounding a thin mesohyl (me) (inset); scale bar b, 100  $\mu$ m. (C) SEM of the dermal tissue shows exopinacocytes are very close to one-another (opposing arrows show cell-cell spacing); scale 1  $\mu$ m. (D) Fluorescent labelling of the basopinacoderm with the steryl dye FM 1–43 highlights the borders of cells showing that a confluent layer of cells covered culture membranes; scale 10  $\mu$ m. (E) Transmission electron microscopy of exopinacocytes shows tight membrane apposition between adjacent cells (arrow). These areas were associated with 10 nm diameter cytoskeletal fibres (arrowheads); scale 200 nm. (F) Fluorescent labelling using phalloidin reveals dense plaques of actin (arrowhead) between cells; nuclei, blue; scale, 5  $\mu$ m.  
doi:10.1371/journal.pone.0015040.g001

basopinacocytes completely covered the membrane, forming a mosaic of cells that resembled vertebrate epithelial cell cultures (Figure 1D). Punctate regions between exopinacocytes were associated with 10 nm diameter actin fibres that extended into the cytoplasm (Figure 1E). These regions corresponded to actin-dense plaques found in the exopinacocyte layers of both *S. lacustris* and *Ephydatia muelleri* (Figure 1F).

Cultures that were confluent across the membranes had resistances ( $R$ ) above  $300 \Omega \text{ cm}^2$  and up to  $5500 \Omega \text{ cm}^2$ , comparable to the resistance of vertebrate epithelia (Figure 2A). Cultures formed from gemmules had a higher resistance (mean  $1932.5 \Omega \text{ cm}^2 \pm 253.5 \text{ s.e.}$ ,  $n=22$ ) than those formed from aggregates (mean  $1098.5 \Omega \text{ cm}^2 \pm 671.5 \text{ s.e.}$ ,  $n=33$ ) (Figure S1), possibly because the cultures made from gemmules contained more cells. Initial resistances of the sponge epithelium were even higher, but dropped when we began recording because it was necessary to add salt ( $<0.1\%$  w/v NaCl) to the medium so that the instrument could measure a current. We found that the resistance stabilized at 30% of the initial value after 10 minutes; here we report the resistance after two minutes in the recording medium.

Epithelial resistance varies by orders of magnitude between different tissue types and animals. Freshwater fish gill epithelia have one of the highest recorded resistances at up to  $40,000 \Omega \text{ cm}^2$  (Table S1). However tissues considered to be true epithelia, including proximal kidney tubule, can also have very low resistances when they are associated with nutrient or waste exchange [39]. Leakiness has been loosely correlated with the depth of the junctional complex in the epithelium [40]. In the mouse proximal kidney tubule, a model leaky epithelium, cells appear “suspended in the urinary space” and have convoluted interdigitations of their membranes that make only small

connections with each other and the capillary wall [41]. In contrast, model tight epithelia such as frog skin and fish gill have junctional complexes that form extensive connections around the circumference of the cell. At the molecular level in vertebrates the presence of claudin 2 has recently been shown to correlate directly with leakiness and ability to re-absorb ions [42]. Nevertheless, in the absence of claudins in invertebrates, tightness and leakiness cannot be defined at molecular level. Freshwater sponges represent a mid-range of resistance: typically a resistance of  $500\text{--}1500 \Omega \text{ cm}^2$  is associated with a tight epithelium [39].

Sponge cultures with a high electrical resistance excluded the flux of a 5 kD 1.5 nm diameter  $^3\text{H}$ -inulin tracer (Figure 2B). For cultures with the highest resistance, only 0.8% of the tracer was able to pass through after three hours (Figure 2C). A higher molecular weight tracer ( $^{14}\text{C}$  PEG MW = 7000) was also excluded from passage through sponge cultures that had a high resistance (Figure S2). A potential site for this occlusion is in regions where the membranes of adjacent cells appear fused (Figure 2D). The electron dense tracer ruthenium red (MW = 859) was excluded from the paracellular space (Figure 2E). The tracer was not able to enter the sponge mesohyl (Figure 2F).

To better understand the characteristics of ion occlusion by sponge epithelia we treated cultures with the divalent cation chelators EGTA and EDTA. In the absence of calcium, we expected that, as in vertebrate models, disruption of calcium-dependant adhesion would lower resistance. But neither chelator reduced the resistance of sponge epithelia more than control cultures in recording medium alone (Figure 3A). Both controls and EGTA-treated cultures recovered high resistance after 2 hours in culture medium. These results could suggest that the mechanism of occlusion in freshwater sponges is not calcium dependent, but

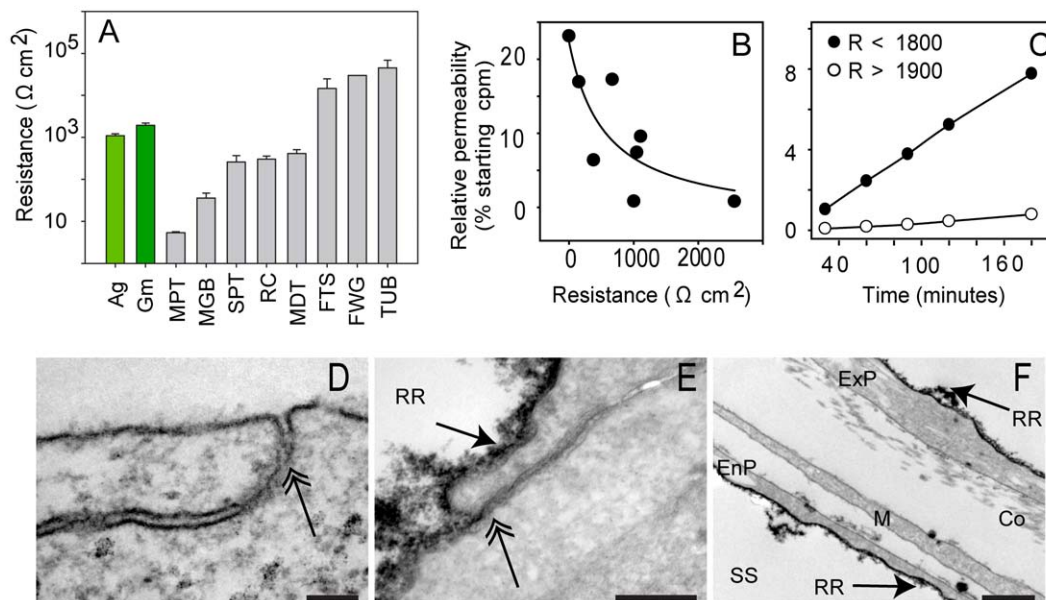

**Figure 2. Electrical resistance and impermeability of *S. lacustris* epithelia.** (A) The resistance to ion passage of *Spongilla* epithelia derived from aggregates (Ag) ( $1098.5 \Omega \text{ cm}^2 \pm 671.5 \text{ s.e.}$ ,  $n=33$ ) and gemmules (Gm) ( $1932.5 \Omega \text{ cm}^2 \pm 253.5 \text{ s.e.}$ ,  $n=22$ ) was comparable to the resistance of epithelia from vertebrate tissues (MPT = mammal proximal tubule, MGB = mammal gall bladder, SPT = salamander proximal tubule, RC = rabbit colon, MDT = mammal kidney distal tubule, FTS = frog/toad skin; FWG = freshwater fish gill; TUB = toad urinary bladder). (B) Permeability to  $^3\text{H}$  inulin decreased with increasing resistance of sponge cultures. (C)  $^3\text{H}$  inulin gradually accumulated on the basolateral side of cultures with low resistance (solid circles,  $<500 \Omega \text{ cm}^2$ ), but was excluded by high resistance epithelia (open circles,  $>800 \Omega \text{ cm}^2$ ). (D) Regions of membrane fusion, as seen by transmission electron microscopy (TEM) were common near the most apical point of cell contact in exopinacocytes; scale 100 nm. (E) Ruthenium red (RR, the dark precipitate) was excluded from paracellular clefts (double arrow); scale, 200 nm. (F) RR was excluded by exopinacocytes (ExP) and endopinacocytes (EnP) from the collagenous (Co) internal mesohyl containing mesohyl cells (M). The tracer entered the aquiferous system through ostia and therefore coated the endopinacoderm (En) roof of the subdermal space (SS); scale, 500 nm. doi:10.1371/journal.pone.0015040.g002

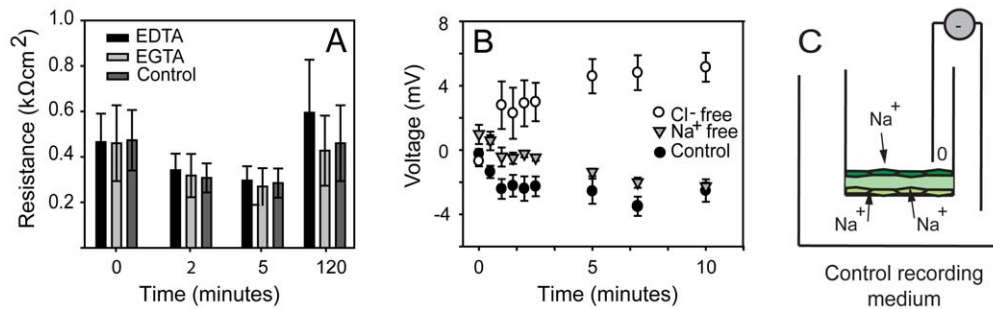

**Figure 3. Ionic basis of occlusion in sponge epithelia. (A)** Effect of EGTA or EDTA treatment on resistance. All cultures lost resistance in the recording medium and recovered high resistance after 2 hr in the culture-medium. **(B)** Voltage across the epithelium was negative in the normal culture medium and in sodium-free medium and positive in chloride-free medium. **(C)** Schematic showing the uptake of sodium in normal recording medium to generate a negative potential.

doi:10.1371/journal.pone.0015040.g003

because ruthenium red was occluded from even the outermost region of the cell-cell junctions it is more likely that in *Spongilla* occluding junctions occur apical to the adherens junctions, so that chelators would not affect the integrity of the occluding junction. A similar situation is seen in *Drosophila*, where the subapical region (SAR, apical to the zonula occludens) has protein complexes that co-localize with tight junctions from vertebrate cells [43]. Alternatively, in sponge epithelia the protein complexes involved in adhering and occluding junctions may not interact as they do in vertebrate models.

The ability to generate an asymmetrical electrochemical potential is a property of all epithelia and confirms that sealing junctions must be present [4]. In symmetrical recording medium (the same solution in both compartments) the sustained transepithelial electrical potential across *Spongilla* cultures was slightly negative ( $\sim -3$  mV, Figure 3B), indicating that active transport occurs between the sponge and the water. To determine the source of the net negative potential we used symmetrical chloride-free or sodium-free media. In Cl-free media the voltage was positive (Figure 3B), indicating a net loss of chloride into the apical compartment. In the absence of sodium voltage was slightly less negative than in the control recording medium (Figure 3B). Although the voltage may arise from net loss of ions it is unlikely that in normal freshwater sodium or chloride would be lost from tissues. Therefore the negative potential in the normal recording medium is most readily explained by active net uptake of sodium (Figure 3C). These results indicate that under normal ionic conditions the apical sponge tissue (endopinacoderm and dermal tissues) is tight, as supported by the lack of tracer flux. Most importantly, the results show that sponge epithelia, like epithelia of other animals, maintain an electric potential.

## Discussion

In this study we show that epithelia in *Spongilla lacustris* have relatively high electrical resistances, can impede the passage of small molecules, and control their membrane potential by transport of ions. Our results provide the first demonstration of high resistance and occlusion of small tracers, and suggest that ion transport also occurs in freshwater sponge tissues; these three features are key indices of epithelial function in vertebrate and invertebrate *in vivo* and *in vitro* systems. Occlusion is likely localized at regions where adjacent cell membranes are in tight contact (Figure 2D). Alternatively, proto-occluding junctions could form a diffuse network along the intercellular cleft, as occurs in the epithelia of developing vertebrates [18]. If so, the resistance of sponge epithelia to ion transport and ability to occlude small molecules may be related to the “membrane spacing factor”

defined by Green and Bergquist [11] and would also control the regular cell spacing between pinacocytes in the absence of septae or other electron dense proteins.

The physiology and morphology described here indicates that sponge epithelia are functionally similar to animal epithelia with tight junctions. The tracer studies show exclusion of 5 kDa molecules; the morphology shows regions of tight membrane apposition and exclusion of ruthenium red, a very small tracer (0.85 kDa) that is commonly used to indicate the location of tight/septate junctions in tissues. Our focus here was on the physiology of sponge epithelia, and we are now examining EST libraries for the presence of Neurexin IV family genes or orthologs of occludins or claudins in other sponges. But given that these genes appear to be absent from the *Amphimedon* genome [5], either *Amphimedon* has secondarily lost genes for occlusion, or the mechanism of occlusion used by sponges has evolved independently from that used by other metazoans. If so, then unknown molecular components may have been responsible for ionic regulation in evolutionarily ancient organisms (e.g. the last common ancestor of animals) and may have been retained in their descendants. Further study of basal node metazoans and comparisons with known vertebrate systems may reveal overlooked or hidden components of epithelial ion regulation and pathophysiology in ‘higher’ animals.

Not all sponges are as easy to culture, but it would be informative to try to culture homoscleromorph sponges to measure the resistance and exclusion of ruthenium red and other molecules by their epithelium. This may reveal physiological differences due to the presence of type IV collagen in the only known sponge group with a true basement membrane. Our attempts to culture tissue from the marine haplosclerid *Haliclona* cf. *permollis* were impeded by the presence of ciliates which eventually destroyed the cells, but cultures should be possible either from marine sponges that produce gemmules, or from other species less prone to infestation by ciliates. Nevertheless, the similarity in morphology of other demosponge epithelia in general [17] suggests that the epithelia of marine demosponges may also seal. Freshwater sponges have arisen from marine haplosclerid sponges [44], which are common in shallow and intertidal habitats worldwide, environments that experience daily changes in salinity and humidity. Therefore marine haplosclerids may also be expected to regulate the passage of solutes. One measurement from our initial work suggested that *Haliclona* tissue also generated a resistance that, as expected, was somewhat lower than that recorded from the freshwater sponge.

The fact that sponges have polarized epithelia that seal and control the passage of solutes implies that at least freshwater

demosponges, and likely other sponges, have functional tissues. These results provide the first concrete evidence to refute the concept that sponges tissues are only transiently sealed [27,28], or “have no internal milieu because the environment can circulate through the body” [4]. This new perspective has relevance to our understanding of the Eumetazoa, which was originally defined to encompass organisms that have a mouth and gut and tissue level organization [45]. If sponges have functional epithelia, and epithelia are usually considered to be tissues, then the presence of tissues can no longer be used as a eumetazoan character. But more importantly, if epithelia exist in sponges, then either demosponges have evolved epithelia independently, or epithelia arose with the evolution of the first multicellular animals (Figure 4). We suggest that the first metazoans must have had a way of controlling their internal milieu in order for signal transduction pathways to function, and that a sealed epithelium was therefore one of the first defining features of multicellular animals.

## Materials and Methods

### Collection, culturing and fixation of tissues

Tissue and gemmules of the freshwater demosponges *Spongilla lacustris* (Linnaeus 1759) and *Ephydatia muelleri* (Lieberkuhn 1955) were collected from Sarita and Rosseau Lakes, Vancouver Island, B.C., Canada. We disassociated 10 cm<sup>2</sup> pieces of *S. lacustris* through 100 µm Nitex mesh into artificial freshwater (M-medium) [46].

Aggregates (~5 mm<sup>3</sup>) formed after a week of gentle rotation at 15°C and were seeded into Millicell hanging cell-culture inserts (polyethylene terephthalate, 0.4 µm pores, 0.33 cm<sup>2</sup> filter area) (Millipore™, Billerica, MA, USA). Alternatively, we seeded 25 gemmules into each insert. Inserts were suspended in a two litre basin of M-medium with aeration to generate water circulation. Fixation for SEM and epifluorescence were described previously [47].

### TER

We used an epithelial volt-ohmmeter (EVOM; W.P.I., Sarasota, FL) to measure the transepithelial electrical resistance across culture inserts in 24-well Falcon culture dishes with 0.25 ml M-medium in the apical and 1.5 ml M-medium in the basal sides (Table S2). Because M-medium had insufficient ions to record current we added 0.06–0.099% w/v NaCl to the M-medium. All recordings were corrected for the empty Millicell insert in each medium. For Ca<sup>2+</sup> chelation, we added 0.5 mM EGTA and 1 mM NMDG-Cl to the recording medium without CaCl<sub>2</sub>. For Ca<sup>2+</sup> and Mg<sup>2+</sup> chelation, we added 0.5 mM EDTA, 2 mM NMDG-Cl and 1.5 mM NMDG-SO<sub>4</sub> to recording medium without MgSO<sub>4</sub>, CaCl<sub>2</sub>, and MgCl<sub>2</sub>. Chemicals were obtained from Sigma (Oakville, ON) unless otherwise noted.

### Paracellular molecule flux

We added 1 µCi ml<sup>-1</sup> of [<sup>3</sup>H] inulin or [<sup>14</sup>C] PEG to the apical side of *S. lacustris* cultures. At t=0 10 µl was sampled from the

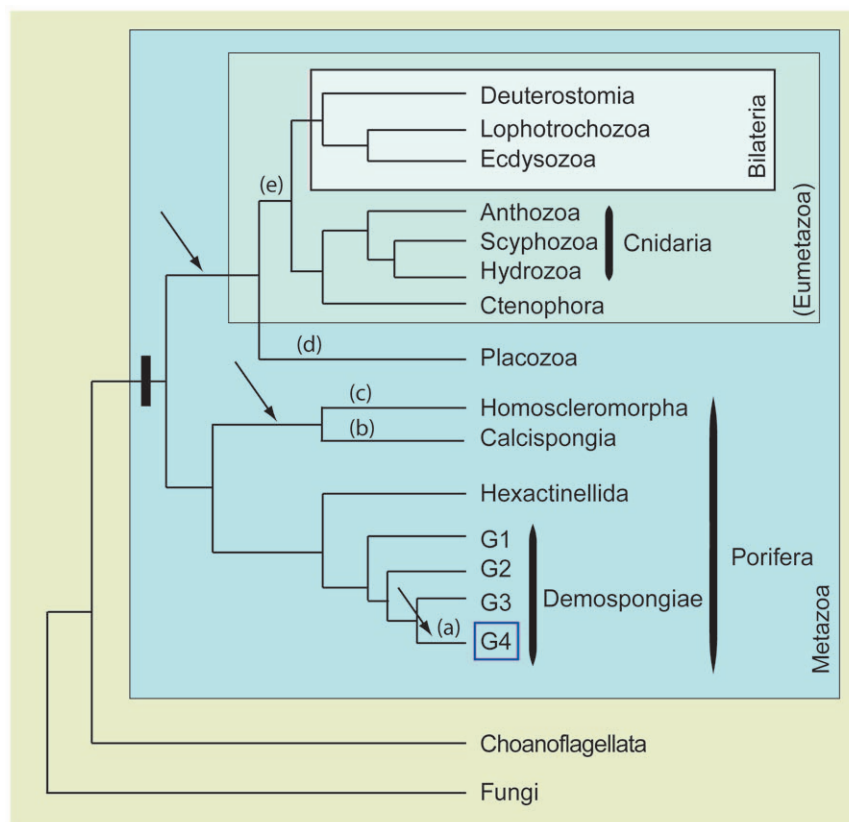

**Figure 4. Sponge phylogeny and the evolution of epithelial characters.** A phylogeny of Metazoa adapted from Philippe et al 2009 which considers Porifera monophyletic. Sponge phylogeny is adapted from [48]. Freshwater sponges belong to the group indicated with a box (G4). Letters indicate evidence of epithelial characters: (a) transepithelial resistance (TER) and transepithelial potential (TEP) in freshwater sponges; (b) septate junctions in calcareous sponges; (c) a basement membrane in homoscleromorphs; (d) absence (loss?) of a basement membrane in placozoans; (e) true epithelia with septate junctions, a basal lamina, TER and TEP in cnidarians and bilaterians. Arrows indicate three potential origins of epithelia; the solid bar indicates the most parsimonious scenario for the origin of epithelia.  
doi:10.1371/journal.pone.0015040.g004

apical side to determine initial value; thereafter 100  $\mu$ l was sampled from the basolateral side every 30, 60, 90, 120 and 180 min. Samples were stored at 4°C, mixed with 4 ml of ACS Fluor scintillation counting fluid (Fisher, Ottawa, ON) and radioactivity was measured with a Beckman LS 6000 scintillation counter. For electron microscopy of tracer flux, tissues were fixed for 1 hour in 2% glutaraldehyde with 1 mg ml<sup>-1</sup> ruthenium red (RR) in 0.02 M cacodylate buffer, rinsed three times in buffer and post-fixed in 1% OsO<sub>4</sub> with 1 mg ml<sup>-1</sup> RR in buffer. Following dehydration in ethanol, the tissue was embedded in Spurs (Electron Microscopy Services, Hatfield, PA, USA); thin sections (60–70 nm) were cut on a Leica Ultracut T ultramicrotome, stained with uranyl acetate and lead citrate and viewed in a Morgagni FEI TEM.

## Supporting Information

**Figure S1 Box plots showing the resistance of tissue cultures from *Spongilla lacustris* gemmules (mean 1932.5  $\Omega$  cm<sup>2</sup>, n = 22, s.e. 253.5) and aggregates (mean 1098.5  $\Omega$  cm<sup>2</sup>, n = 33, s.e. 116.9). Mean = dashed line, Median = solid line, all outliers are shown. (TIF)**

**Figure S2 C<sup>14</sup>-PEG permeability through cultures from aggregates; legend shows the resistances of the different**

**preparations in  $\Omega$  cm<sup>2</sup>.** Preparations with a higher resistance (977  $\Omega$  cm<sup>2</sup>, 908  $\Omega$  cm<sup>2</sup>) excluded more radioactive tracer than cultures with a low resistance (231  $\Omega$  cm<sup>2</sup>). In all cases the amount of tracer that could pass through the sponge tissue did not increase over time. (TIF)

**Table S1 Data sources for meta-analysis of resistance of epithelial cultures.** (Adapted from Boulpaep & Seely 1971, Claude & Goodenough 1973, and Powell 1981). (DOC)

**Table S2 Salt concentrations in culture media.** (DOC)

## Acknowledgments

We thank the Director and staff at the Bamfield Marine Sciences Centre for use of facilities and A.R. Palmer and W. Gallin for comments on an earlier draft.

## Author Contributions

Conceived and designed the experiments: EDMA SPL GGG. Performed the experiments: EDMA SPL GGG. Analyzed the data: EDMA SPL GGG. Contributed reagents/materials/analysis tools: SPL GGG. Wrote the paper: EDMA SPL GGG.

## References

- Philippe H, Derelle R, Lopez P, Pick K, Borchellini C, et al. (2009) Phylogenomics Revives Traditional Views on Deep Animal Relationships. *Curr Biol* 19: 706–712.
- Love GD, Grosjean E, Stalvies C, Fike DA, Grotzinger JP, et al. (2009) Fossil steroids record the appearance of Demospongiae during the Cryogenian period. *Nature* 457: 718–721.
- Mackie GO (1984) Introduction to the diploblastic level. In: Bereiter-Hahn J, Matolsky AG, Richards KS, eds. *Biology of the integument*. Berlin: Springer-Verlag. pp 43–46.
- Cerejido M, Contreras RG, Shoshani L (2004) Cell adhesion, polarity, and epithelia in the dawn of metazoans. *Physiol Rev* 84: 1229–1262.
- Srivastava M, Simakov O, Chapman J, Fahey B, Gauthier M, et al. (2010) The *Amphimedon queenslandica* genome and the evolution of animal complexity. *Nature* 466: 720–727.
- Shaw J (1958) Salt and water balance in animal life. 182: 1207–1208.
- Tyler S (2003) Epithelium - The primary building block for metazoan complexity. *Integr Comp Biol* 43: 55–63.
- Sperling EA, Peterson KJ, Pisani D (2009) Phylogenetic-Signal dissection of nuclear housekeeping genes supports the paraphyly of sponges and the monophyly of Eumetazoa. *Mol Biol Evol* 26: 2261–2274.
- Dunn CW, Hejnol A, Matus DQ, Pang K, Browne WE, et al. (2008) Broad phylogenomic sampling improves resolution of the animal tree of life. *Nature* 452: 745–749.
- Dellaporta SL, Xu A, Sagasser S, Jakob W, Moreno MA, et al. (2006) Mitochondrial genome of *Trichoplax adhaerens* supports Placozoa as the basal lower metazoan phylum. *Proc Natl Acad Sci USA* 103: 8451–8756.
- Green CR, Bergquist PR (1982) Phylogenetic relationships within the invertebrata in relation to the structure of septate junctions and the development of occluding junctional types. *J Cell Sci* 53: 279–305.
- Hand AR, Gobel S (1972) The structural organization of the septate and gap junctions of *Hydra*. *J Cell Biol* 52: 397–408.
- Leik J, Kelly D (1970) Septate junctions in the gastrodermal epithelium of *Phialidium*: A fine structural study utilizing ruthenium red. *Tissue Cell* 2: 435–541.
- Grell K, Benwitz G (1971) Die Ultrastruktur von *Trichoplax adhaerens* F.E. Schulze. *Cytobiologie* 4: 216–240.
- Anderson JM, Van Itallie CM (2009) Physiology and Function of the Tight Junction. *CSH Pers Biol* 1: doi: 10.1101/cshperspect.a002584.
- Timpl R (1996) Macromolecular organization of basement membranes. *Curr Opin Cell Biol* 8: 618–624.
- Leys SP, Nichols SA, Adams EDM (2009) Epithelia and integration in sponges. *Integr Comp Biol* 49: 167–177.
- Franko W, Rickelt S, Barth M, Pieperhoff S (2009) The junctions that don't fit the scheme: special symmetrical cell-cell junctions of their own kind. *Cell Tiss Res* 338: 1–17.
- Wilson HV (1910) A study of some epithelioid membranes in monaxonoid sponges. *J Exp Zool* 9: 537–577.
- Parker GH (1910) The reactions of sponges with a consideration of the origin of the nervous system. *J Exp Zool* 8: 765–805.
- Leys SP, Cheung E, Boury-Esnault N (2006) Embryogenesis in the glass sponge *Oophasac minuta*: formation of syncytia by fusion of blastomeres. *Integr Comp Biol* 46: 104–117.
- Leys SP, Mackie GO (1997) Electrical recording from a glass sponge. *Nature (Lond)* 387: 29–30.
- Adell T, Nefkens I, Muller WEG (2003) Polarity factor 'Frizzled' in the demosponge *Suberites domuncula*: identification, expression and localization of the receptor in the epithelium/pinacoderm. *FEBS* 554: 363–368.
- Fahey B, Degnan BM (2010) Origin of animal epithelia: insights from the sponge genome. *Evo & Devo* 12: 601–617.
- Nichols SA, Dirks W, Pearce JS, King N (2006) Early evolution of animal cell signaling and adhesion genes. *Proc Natl Acad Sci USA* 103: 12451–12456.
- Ledger PW (1975) Septate junctions in the calcareous sponge *Sycon ciliatum*. *Tissue Cell* 7: 13–18.
- Green CR, Bergquist PR (1979) Cell membrane specialisations in the Porifera. *Colloq Int Cent Natl Rech Sci, Biologie des Spongiaires* 291: 153–158.
- Magie C, Martindale MQ (2008) Cell-cell adhesion in the Cnidaria: Insights into the evolution of tissue morphogenesis. *Biol Bull* 214: 218–232.
- Revel J-P (1966) Fine structure of intercellular contacts in the sponge, *Microciona prolifera*. *Biol Bull* 131: 402.
- Eerkes-Medrano D, Leys SP (2006) Ultrastructure and embryonic development of a syconoid calcareous sponge. *Invertebr Biol* 125: 177–194.
- Adell T, Gamulin V, Perovic-Ottstadt S, Wiens M, Korzhnev M, et al. (2004) Evolution of metazoan cell junction proteins: the scaffold protein MAGI and the transmembrane receptor tetraspanin in the demosponge *Suberites domuncula*. *J Mol Evol* 59: 41–50.
- Boute N, Exposito JY, Boury-Esnault N, Vacelet J, Nor N, et al. (1996) Type IV collagen in sponges, the missing link in basement membrane ubiquity. *Biol Cell* 88: 37–44.
- Labat-Robert J, Robert L, Auger C, Lethias C, Garrone R (1981) Fibronectin-like protein in Porifera: its role in cell aggregation. *Proc Natl Acad Sci USA* 78: 6261–6265.
- Aouacheria A, Geourjon C, Aghajari N, Navratil V, Deléage G, et al. (2006) Insights into early extracellular matrix evolution: spongin short chain collagen-related proteins are homologous to basement membrane Type IV collagens and form a novel family widely distributed in invertebrates. *Mol Biol Evol* 23: 2288–2302.
- Brower DL, Brower SM, Hayward DC, Ball EE (1997) Molecular evolution of integrins: Genes encoding integrin Beta subunits from a coral and a sponge. *Proc Natl Acad Sci USA* 94: 9182–9187.
- Elliott G, Leys S (2010) Evidence for glutamate, GABA and NO in coordinating behaviour in the sponge, *Ephydatia muelleri* (Demospongiae, Spongillidae). *J Exp Biol* 213: 2310–2321.
- Nickel M (2010) Evolutionary emergence of synaptic nervous systems: what can we learn from the non-synaptic, nerveless Porifera? *Invertebr Biol* 129: 1–16.

38. Wilson HV (1907) On some phenomena of coalescence and regeneration in sponges. *J Exp Zool* 5: 245–258.
39. Claude P, Goodenough DA (1973) Fracture faces of zonulae occludentes from “tight” and “leaky” epithelia. *J Cell Biol* 58: 390–400.
40. Skaer HLB, Maddrell SHP (1987) How are invertebrate epithelia made tight? *J Cell Sci* 88: 139–141.
41. Pease D (1955) Fine structures of the kidney seen by electron microscopy. *J Histochem Cytochem* 3: 295–308.
42. Muto S, Hata M, Taniguchi J, Tsuruoka S, Moriwaki K, et al. (2010) Claudin-2-deficient mice are defective in the leaky and cation-selective paracellular permeability properties of renal proximal tubules. *Proc Natl Acad Sci USA* 107: 8011–8016.
43. Knust E, Bossinger O (2002) Composition and formation of intercellular junctions in epithelial cells. *Science* 298: 1955–1959.
44. Meixner MJ, Lüter C, Eckert C, Itskovich V, Janussen D, et al. (2007) Phylogenetic analysis of freshwater sponges provide evidence for endemism and radiation in ancient lakes. *Mol Phyl Evol* 45: 875–886.
45. Hyman LH (1940) *The Invertebrates*. New York: McGraw-Hill. 726 p.
46. Rasmont R (1966) Une technique de culture des éponges d’eau douce en milieu contrôlé. *Ann Soc R Zool Belg* 91: 147–156.
47. Elliott G, Leys SP (2007) Coordinated contractions effectively expel water from the aquiferous system of a fresh water sponge. *J Exp Biol* 210: 3736–3748.
48. Borchellini C, Chombard C, Manuel M, Alivon E, Vacelet J, et al. (2004) Molecular phylogeny of Demospongiae: implications for classification and scenarios of character evolution. *Mol Phylogenet Evol* 32: 823–837.
